# Supplementary material
Source: PubMed Central journal article supplement (PMC4268311)
Supplement: NIHMS614040-supplement-supplement_1.pdf [file NIHMS614040-supplement-supplement_1.pdf]

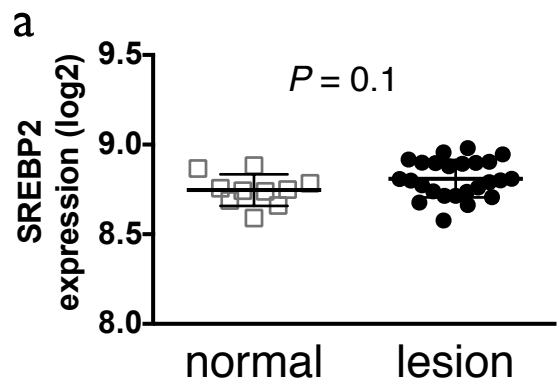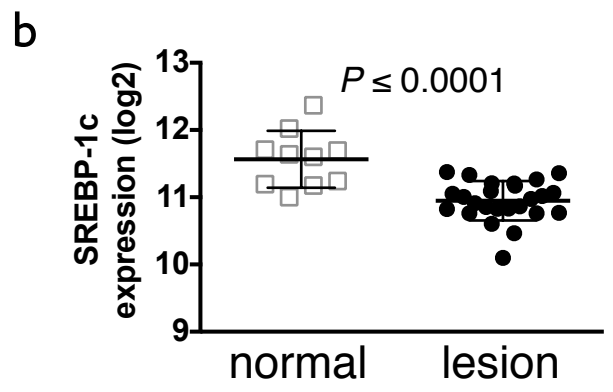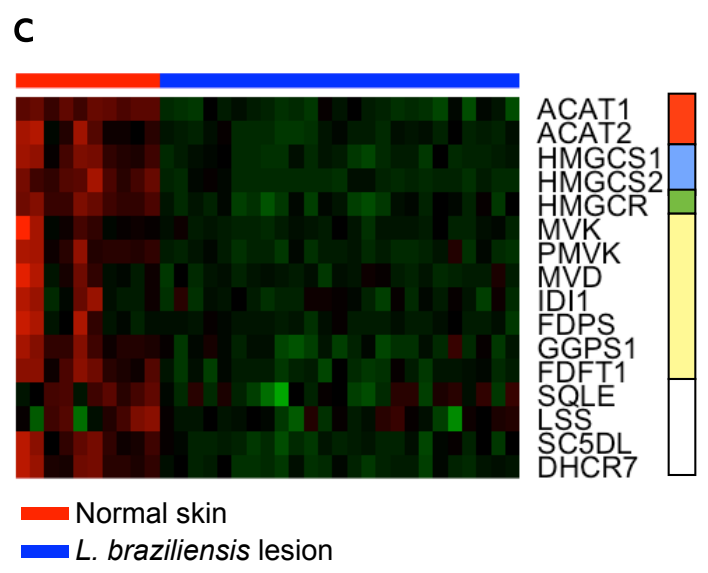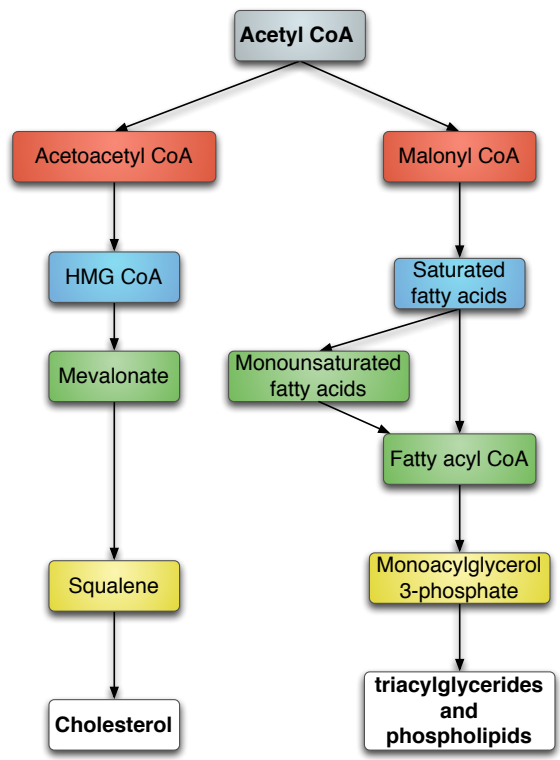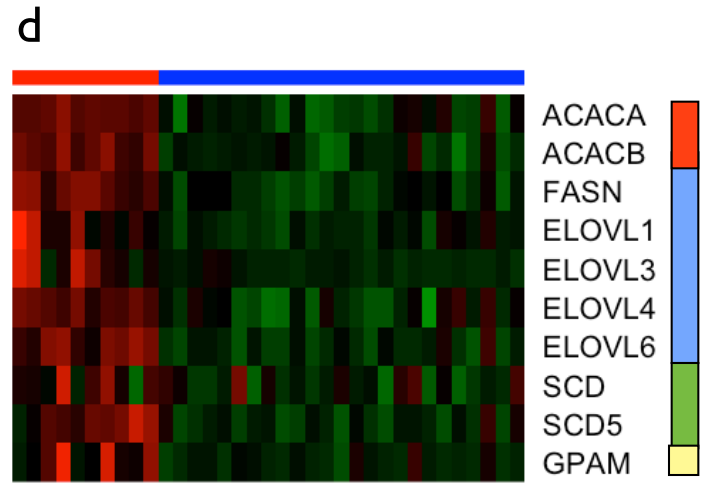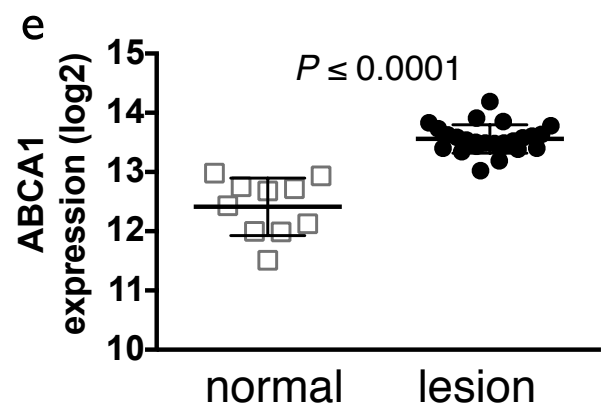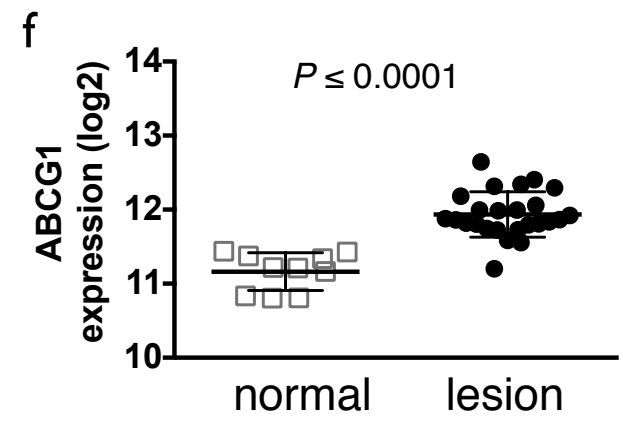

**Figure S1: Disregulated lipid metabolism in *L. braziliensis* lesions.** Log<sub>2</sub> expression of (a) *SREBP2* and (b) *SREBP-1c*, master transcriptional regulators of cholesterol and fatty acid biosynthesis, respectively. Heatmaps showing patient-level data for known targets of *SREBP2* and *SREBP-1c* involved in (c) cholesterol and (d) fatty acid biosynthesis. (e-f) Log<sub>2</sub> expression of *ABCA1* and *ABCG1*, major cellular exporters of cholesterol and fatty acids. Pathway schematic shows steps involved in synthesis of cholesterol (left branch) and triglycerides and free fatty acids (right branch) from acetyl-CoA. Colored bar to right of heatmaps indicates which genes are involved in the synthesis of which molecules in the pathway schematic (i.e. *ACAT1* and *ACAT2* act on acetyl CoA to produce acetoacetyl CoA, while *ACACA* and *ACACB* make malonyl CoA from acetyl CoA).

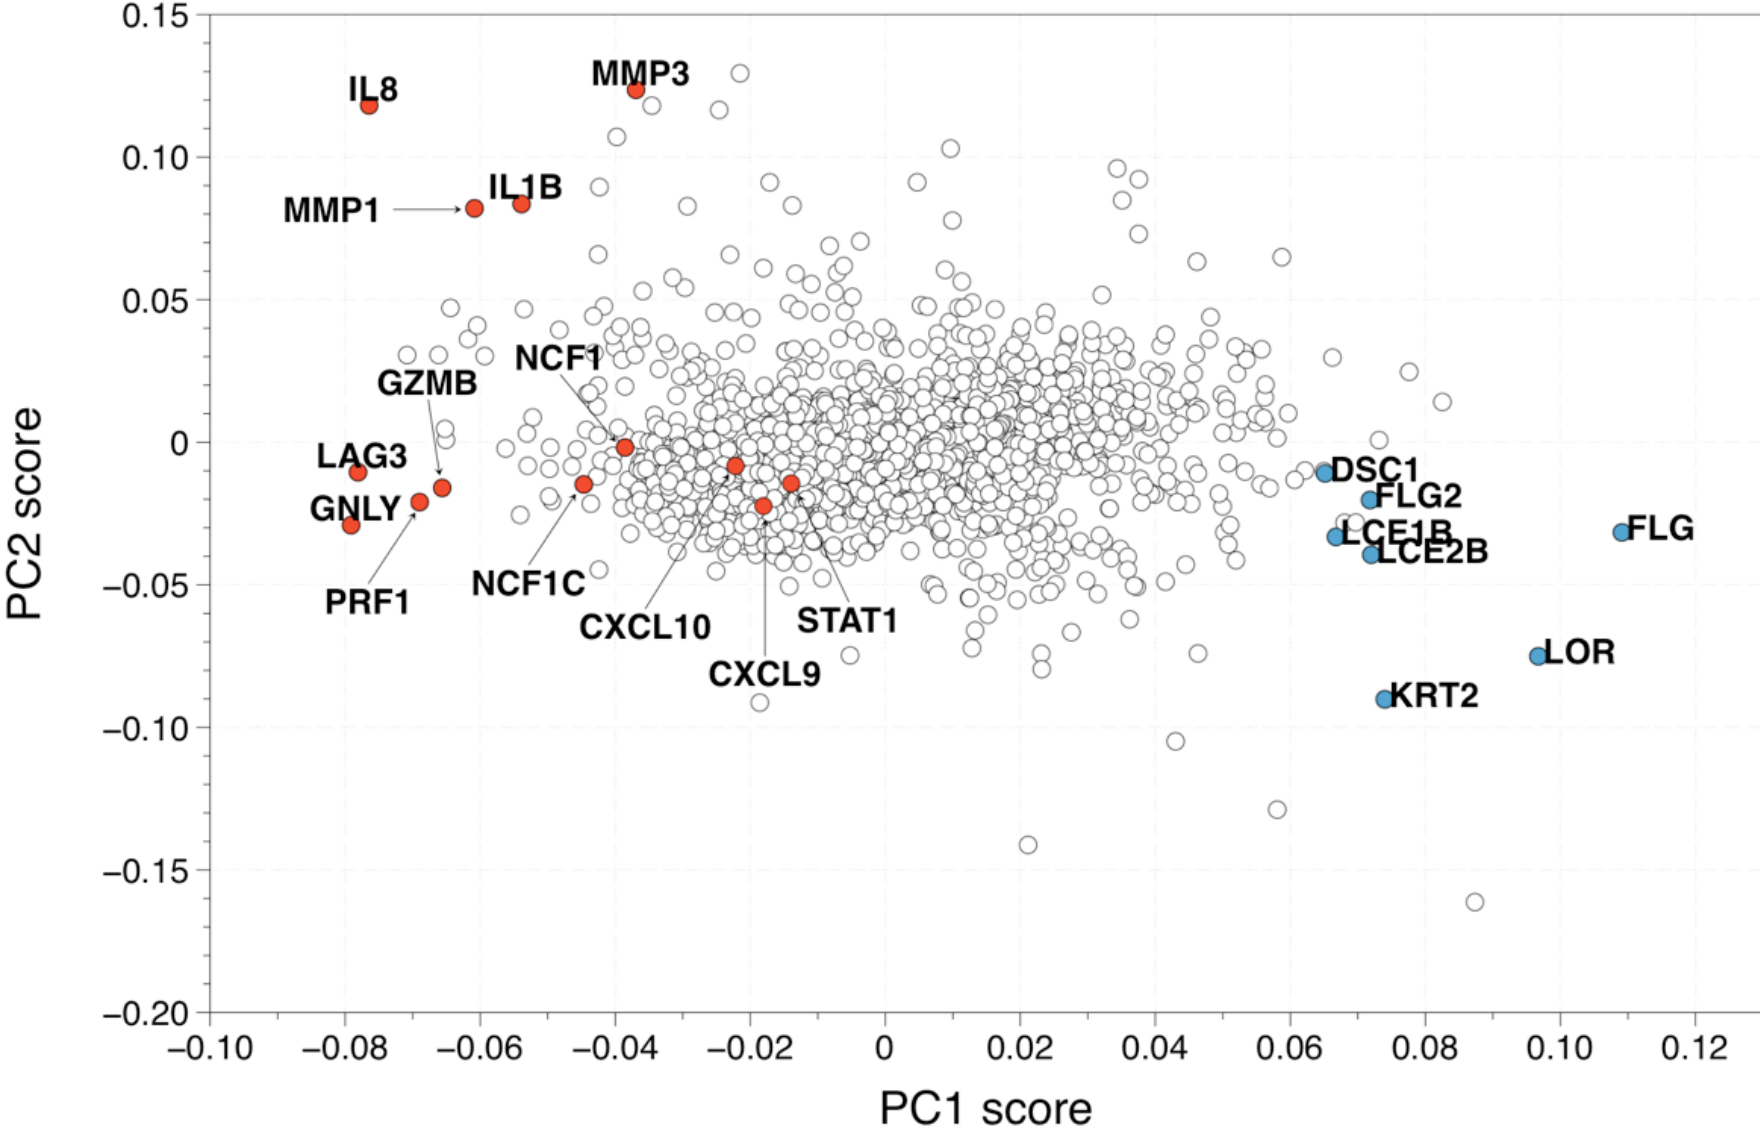

**Figure S2: Scores plot from PCA of lesion biopsy samples showing PCA score (for PC1 vs. PC2) for each of the 2,028 differentially expressed genes.** A selection of immune genes (red) and genes involved in maintaining skin barrier function (blue) are labeled with gene symbols and were used for correlation analysis shown in Fig. 5b. Abbreviations: PCA, principal component analysis.

**Table S1:** Demographic and clinical metadata from *L. braziliensis* patients.

| Patient info. |     |     | Lesion characteristics |                         |            | Response to treatment |                 |
|---------------|-----|-----|------------------------|-------------------------|------------|-----------------------|-----------------|
| Identifier    | Age | Sex | Stage                  | Size (mm <sup>2</sup> ) | Location   | Cure by 60 days       | Cure 60-90 days |
| early_1       | 24  | M   | early (nodular)        | 40                      | right leg  | No                    | No              |
| early_2       | 44  | F   | early (nodular)        | 36                      | left thigh | Yes                   | <i>n.a.</i>     |
| early_3       | 31  | F   | early (nodular)        | 56                      | right leg  | No                    | No              |
| early_4       | 25  | F   | early (nodular)        | 120                     | left leg   | No                    | Yes             |
| early_5       | 30  | F   | early (nodular)        | 25                      | left leg   | No                    | No              |
| early_6       | 40  | M   | early (nodular)        | 4                       | right leg  | No                    | No              |
| early_7       | 25  | F   | early (nodular)        | 12                      | left thigh | No                    | Yes             |
| early_8       | 33  | M   | early (nodular)        | 80                      | right leg  | No                    | Yes             |
| late_1        | 25  | M   | late (ulcer)           | 440                     | left leg   | No                    | Yes             |
| late_2        | 27  | M   | late (ulcer)           | 252                     | left leg   | No                    | Yes             |
| late_3        | 19  | M   | late (ulcer)           | 100                     | left leg   | Yes                   | <i>n.a.</i>     |
| late_4        | 18  | M   | late (ulcer)           | 180                     | left leg   | Yes                   | <i>n.a.</i>     |
| late_5        | 33  | F   | late (ulcer)           | 560                     | left arm   | No                    | No              |
| late_6        | 28  | M   | late (ulcer)           | 440                     | left leg   | No                    | Yes             |
| late_7        | 25  | M   | late (ulcer)           | 100                     | left leg   | No                    | No              |
| late_8        | 45  | F   | late (ulcer)           | 100                     | right arm  | Yes                   | <i>n.a.</i>     |
| late_9        | 21  | M   | late (ulcer)           | 48                      | right arm  | No                    | Yes             |
| late_10       | 26  | F   | late (ulcer)           | 48                      | left leg   | No                    | Yes             |
| late_11       | 37  | M   | late (ulcer)           | 550                     | left leg   | No                    | Yes             |
| late_12       | 19  | M   | late (ulcer)           | 960                     | right leg  | No                    | Yes             |
| late_13       | 19  | F   | late (ulcer)           | 192                     | right leg  | No                    | Yes             |
| late_14       | 25  | M   | late (ulcer)           | 380                     | right leg  | Yes                   | <i>n.a.</i>     |
| late_15       | 30  | M   | late (ulcer)           | 250                     | abdome     | No                    | No              |
| late_16       | 33  | F   | late (ulcer)           | 100                     | right leg  | Yes                   | <i>n.a.</i>     |
| late_17       | 40  | M   | late (ulcer)           | 400                     | right leg  | Yes                   | <i>n.a.</i>     |

**Table S2: Normalized, batch corrected Log<sub>2</sub> expression and average Log<sub>2</sub> FC for 20,942 genes across all 35 skin samples (10 normal, 8 early lesions, 17 late lesions) represented by one or more probesets from the Illumina HT-12v4 beadarray.**

Abbreviations: FC, fold-change. Data can be viewed and downloaded at:

<http://dx.doi.org/10.6084/m9.figshare.1099772>

**Table S3: Log<sub>2</sub> expression and average Log<sub>2</sub> FC for 2,028 genes across all 35 skin samples (10 normal, 8 early lesions, 17 late lesions) differentially expressed with a FC  $\geq 2$  and FDR  $\leq 1\%$ .** Abbreviations: FC, fold-change; FDR, false discovery rate.

Data can be viewed and downloaded at:

<http://dx.doi.org/10.6084/m9.figshare.1099765>

**Table S4: Pathway enrichment analysis.** Excel spreadsheet showing pathways and their enrichment score from Fig. 2b found by GSEA to be enriched 16 fold (FDR  $\leq 1\%$ ) in *L. braziliensis* lesions, relative to normal skin. Functionally related pathways manually grouped together for simplified representation in Fig. 2b are shown as a separate tab in the spreadsheet. Abbreviations: GSEA, gene set enrichment analysis; FDR, false discovery rate. Data can be viewed and downloaded at:

<http://dx.doi.org/10.6084/m9.figshare.1099764>

**Table S5: Comparison of transcriptional responses in *L. braziliensis* lesions with published psoriasis meta-analysis.** Log<sub>2</sub> FC in gene expression between skin lesion and normal control skin for 17,070 genes in common between the *L. braziliensis* data and published psoriasis ‘MAD3’ data. Rank order is shown for both *Leishmania* and psoriasis data in which genes were ranked from most highly upregulated in lesion (rank = 1) to most downregulated in lesion (rank = 17,070). Abbreviations: FC, fold change.

Data can be viewed and downloaded at:

<http://dx.doi.org/10.6084/m9.figshare.1099767>
